# Supplementary material
Source: publisher figshare collection journal article supplement (https://acs.figshare.com/ndownloader/files/15468044)
Supplement: Supplementary file 1 [file 15468044]

## Supplemental Information

# Effects of Photolysis on the Chemical and Optical Properties of Secondary Organic Material Over Extended Timescales

*Emma Q. Walhout<sup>1</sup>, Hongmin Yu<sup>1</sup>, Corey Thrasher<sup>1</sup>, Jacob Shusterman<sup>1</sup>, Rachel E. O'Brien<sup>1\*</sup>*

[1] Department of Chemistry, College of William and Mary, Williamsburg, Virginia, 23185, USA

KEYWORDS: chromophore, absorption cross section,  $\alpha$ -pinene, offline-AMS, Orbitrap MS, oligomer

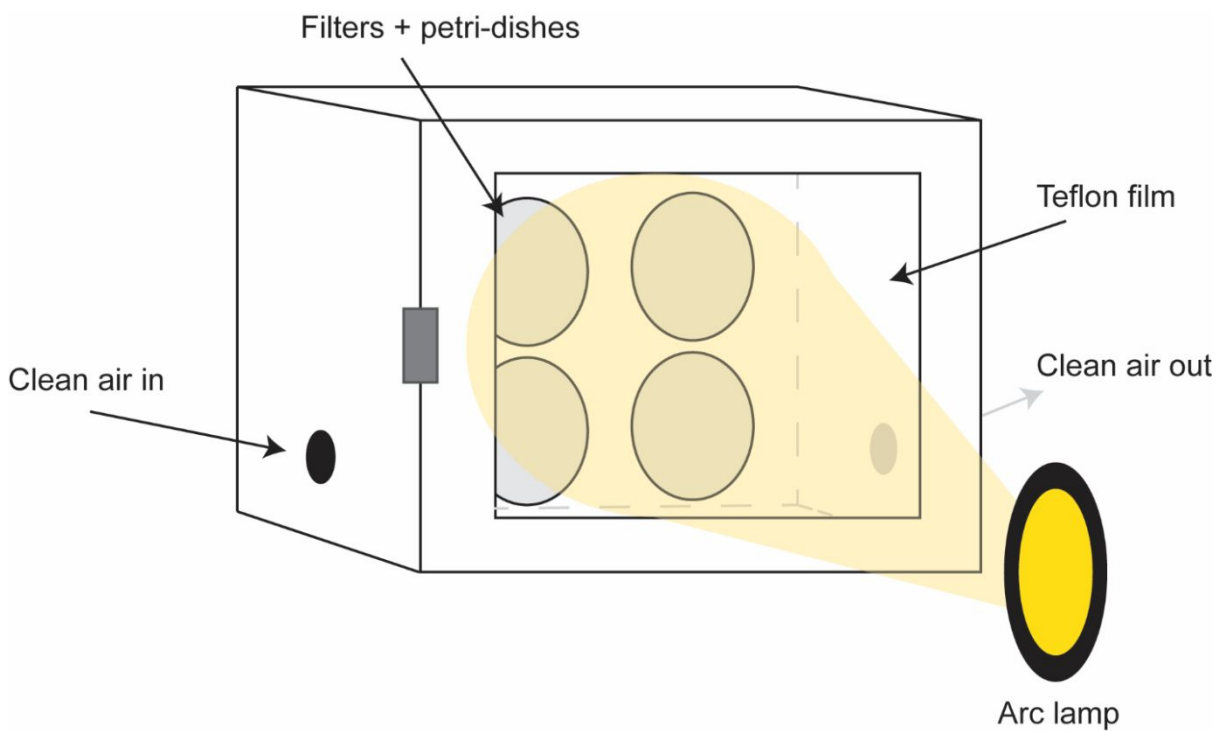

**Figure S1.** Diagram of photolysis box. The Teflon filters are mounted vertically, the box is sealed with a thin Teflon film and Swagelok ports provide in and out flow for clean air.

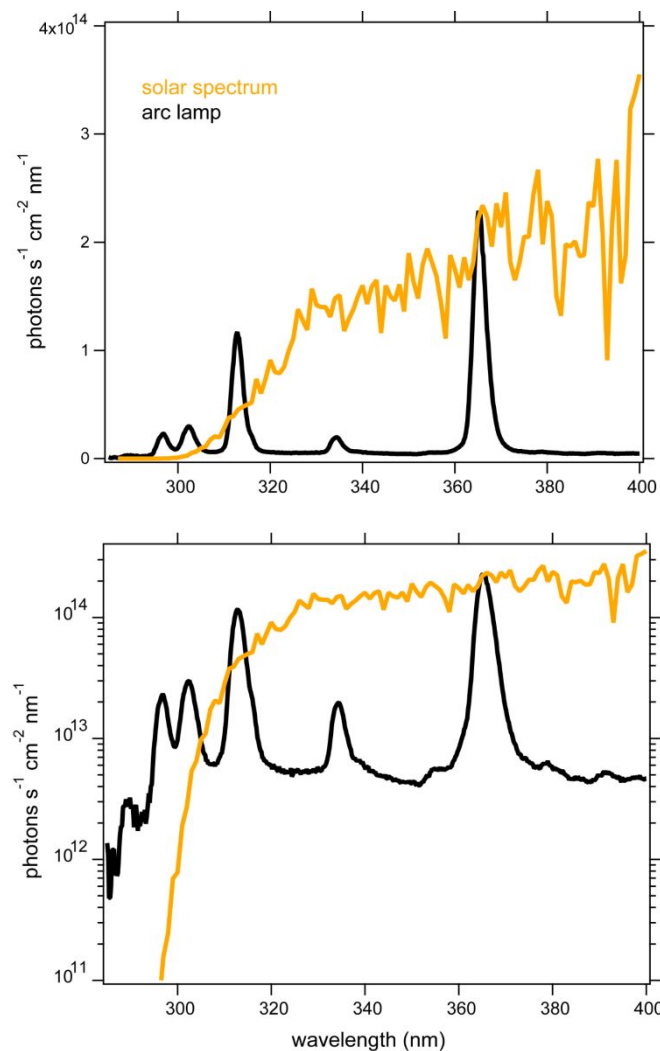

**Figure S2.** Measured photon flux in the photo-box compared to actinic flux for 40°N, 45° solar zenith angle. The actinic flux was obtained from the Quick TUV Calculator available at [http://cprm.acom.ucar.edu/Models/TUV/Interactive\\_TUV/](http://cprm.acom.ucar.edu/Models/TUV/Interactive_TUV/). Overhead ozone was 300 Dobson, surface albedo was 0.1, altitude was 0 km, cloud and aerosol optical depths were 0. Top: linear scale on y-axis, bottom: log scale on y-axis.

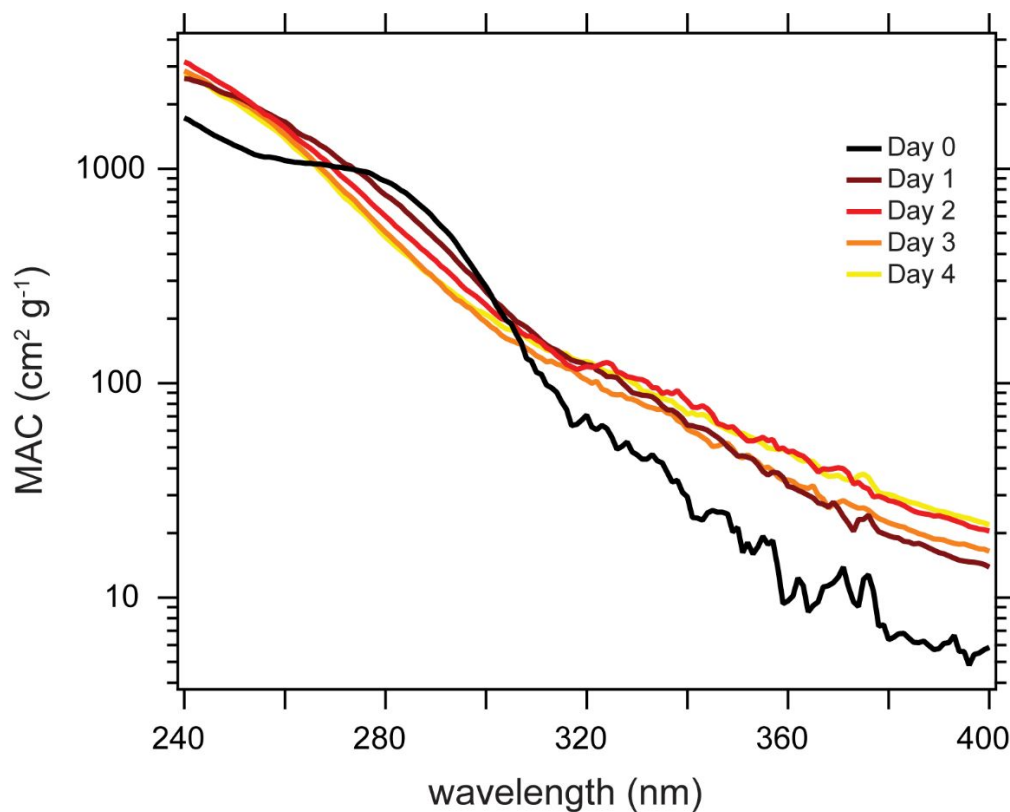

**Figure S3.** Mass absorption coefficients ( $\text{cm}^2 \text{g}^{-1}$ ) for irradiated  $\alpha$ -pinene SOM for days 0-4. Here, the same RIE value (1.8) is used to calculate the initial organic concentration in the extract for both the irradiated and the dark (day 0) samples. This leads to a lower concentration and a higher MAC value. The MAC values are plotted on a logarithmic scale and a 3 point boxcar smooth was applied to all lines.

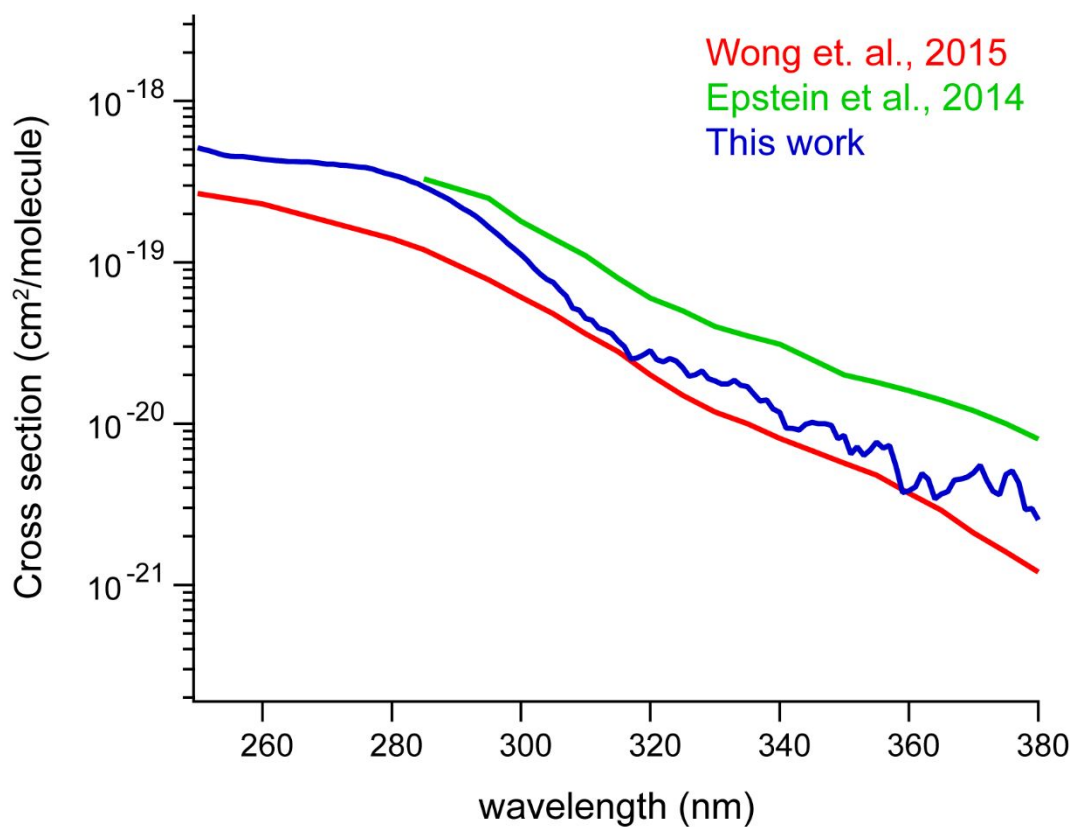

**Figure S4.** Cross sections for fresh  $\alpha$ -pinene SOA from the literature and this work. The Epstein data set is reported to 280 nm. Here the blue line is calculated from the MAC value for the  $t = 0$  and the average molecular weight (240 amu).

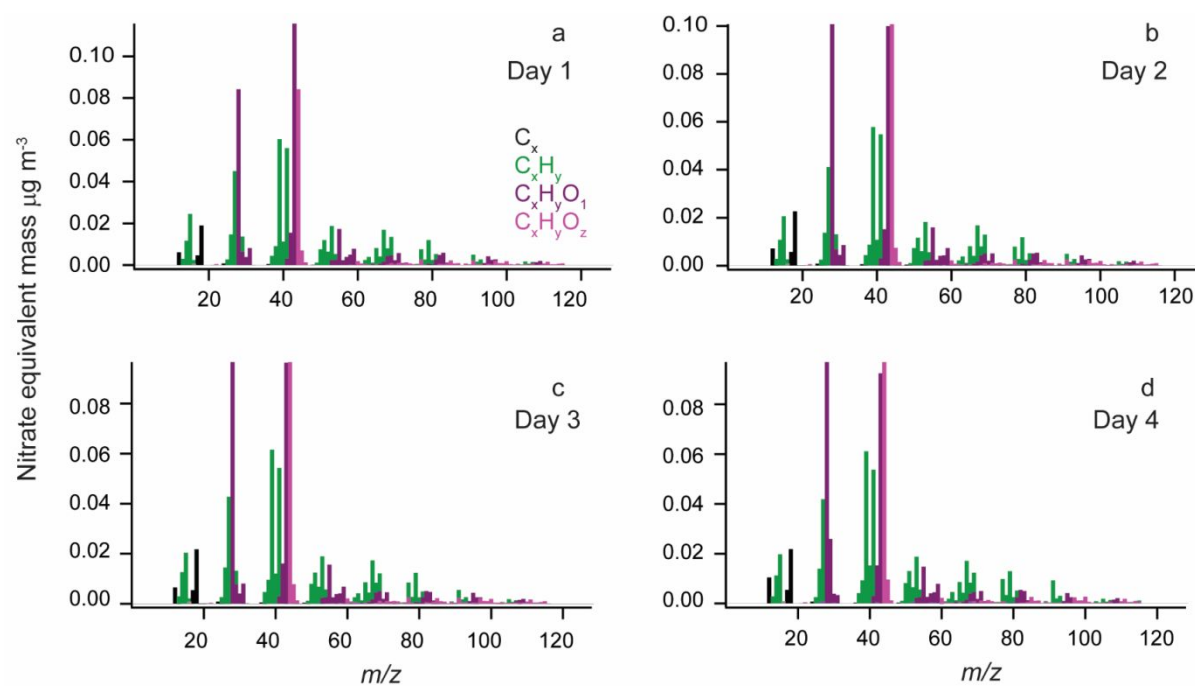

**Figure S5.** Offline-AMS mass spectra for irradiated samples days 1-4 (a-d, respectively). Ions are colored by fragmentation families.

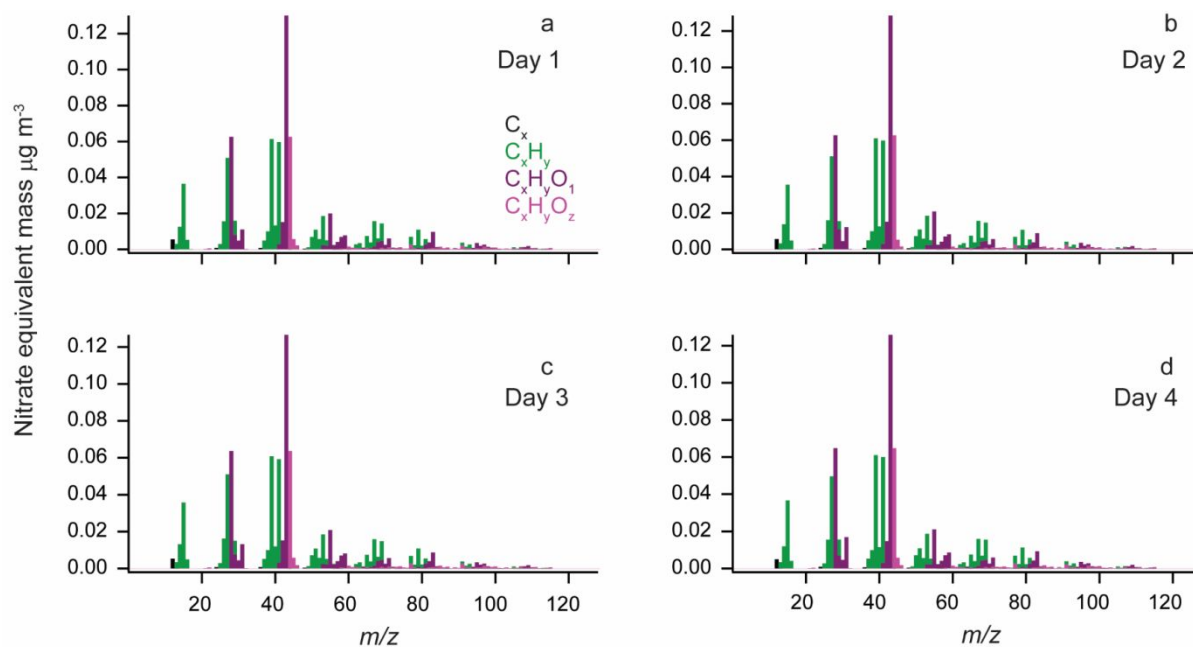

**Figure S6.** Offline-AMS mass spectra for dark samples days 1-4 (a-d, respectively). Ions are colored by fragmentation families.
